# Supplementary material for: A Snake Venom Peptide and Its Derivatives Prevent Aβ42 Aggregation and Eliminate Toxic Aβ42 Aggregates In Vitro
Source: PubMed Central journal article supplement (PMC11258689; doi:10.1021/acschemneuro.4c00089), 2024-07-03
Supplement: cn4c00089_si_001.pdf [file cn4c00089_si_001.pdf]

# Supplementary Information

## A snake venom peptide and its derivatives prevent A $\beta$ <sub>42</sub> aggregation and eliminate toxic A $\beta$ <sub>42</sub> aggregates *in vitro*

Luana Cristina Camargo<sup>1,2</sup>, Ian Gering<sup>1</sup>, Mohammadamin Mastalipour<sup>2</sup>, Victoria Kraemer-Schulien<sup>1</sup>, Tuyen Bujnicki<sup>1</sup>, Dieter Willbold<sup>1,2</sup>, Mônica A. Coronado<sup>1,2\*</sup>, Raphael J. Eberle<sup>1,2\*</sup>

<sup>1</sup>Institute of Biological Information Processing (IBI-7: Structural Biochemistry), Forschungszentrum Jülich, 52428 Jülich, Germany.

<sup>2</sup>Heinrich Heine University Düsseldorf. Faculty of Mathematics and Natural Sciences, Institute of Physical Biology, 40225 Düsseldorf, Germany.

Correspondence: [monikacoronado@gmail.com](mailto:monikacoronado@gmail.com) (M.A.C.); [r.eberle@fz-juelich.de](mailto:r.eberle@fz-juelich.de) (R.J.E.)

### Table of contents

Figure S1. HPLC chromatograms of CDP-1 to -4.

Figure S2. HPLC chromatograms of CDP-5 to -8 and CDP-1D.

Figure S3. Effect of CDP-3, -4, -5 and -7 on A $\beta$ <sub>42</sub> aggregation using ThioflavinT assays.

Figure S4. Dose dependency of CDP-1 and CDP-2 against the A $\beta$ <sub>42</sub> aggregation.

Figure S5. sFIDA A $\beta$  aggregate control.

Figure S6. Biacore SPR kinetic analyses of peptides to A $\beta$ <sub>42</sub>.

Figure S7 MTT assay of CDPs on SH-SY5Y cells.

Figure S8. MTT assay of CDPs on HEK293 cells.

Figure S9. CD spectra of CDPs.

Figure S10. Negatively charged residues in the A $\beta$  structure and surface.

Table S1. Secondary structure content of CDPs, based on CD-experiments

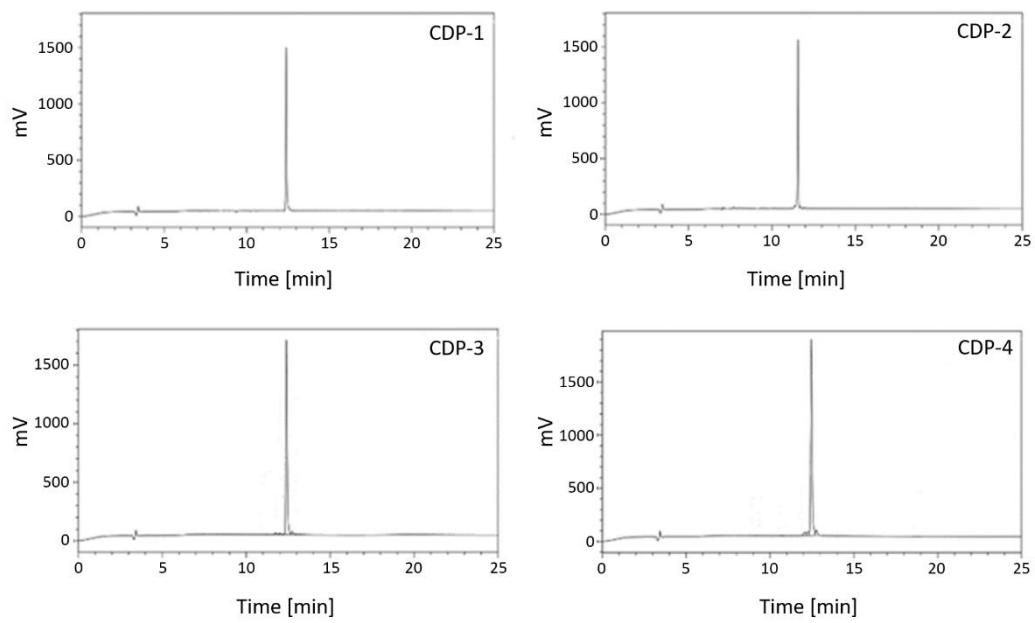

**Figure S1. HPLC chromatograms of CDP-1 to CDP-4.**

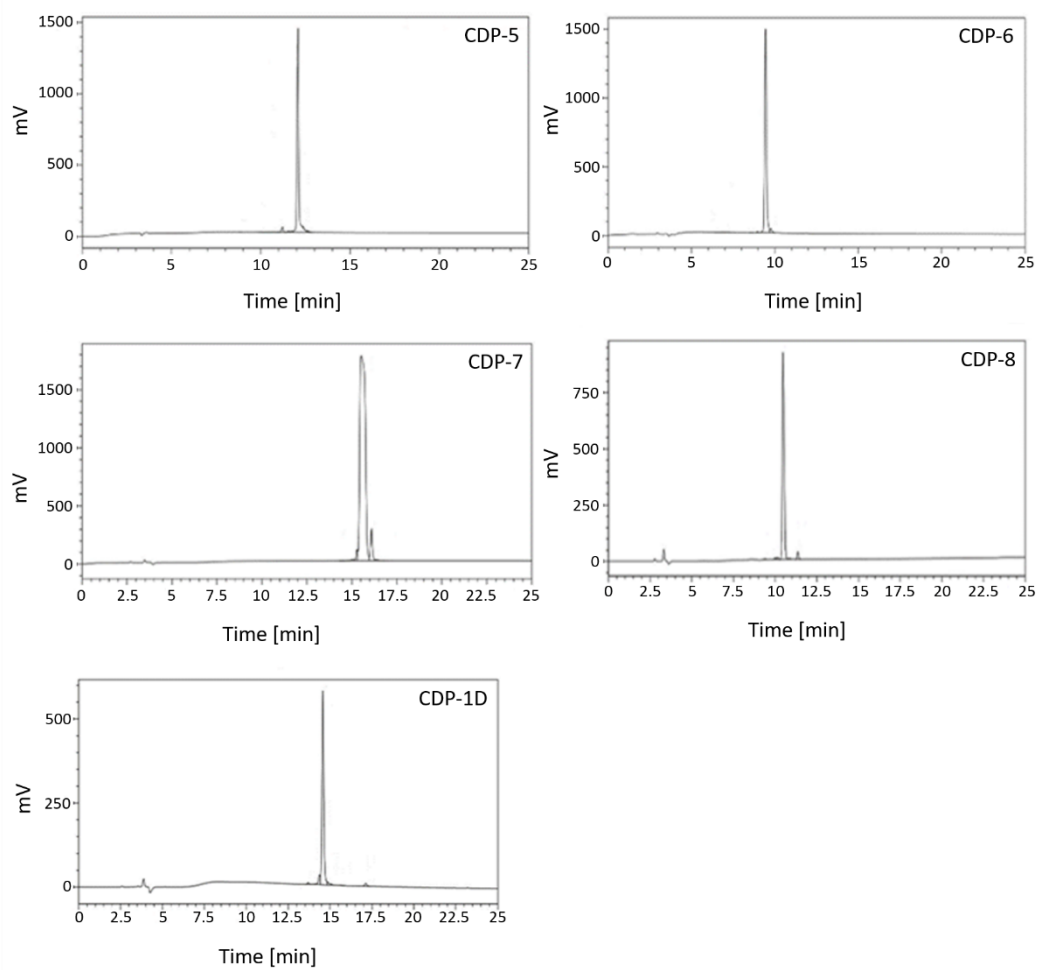

Figure S2. HPLC chromatograms of CDP-5 to CDP-8 and CDP-1D.

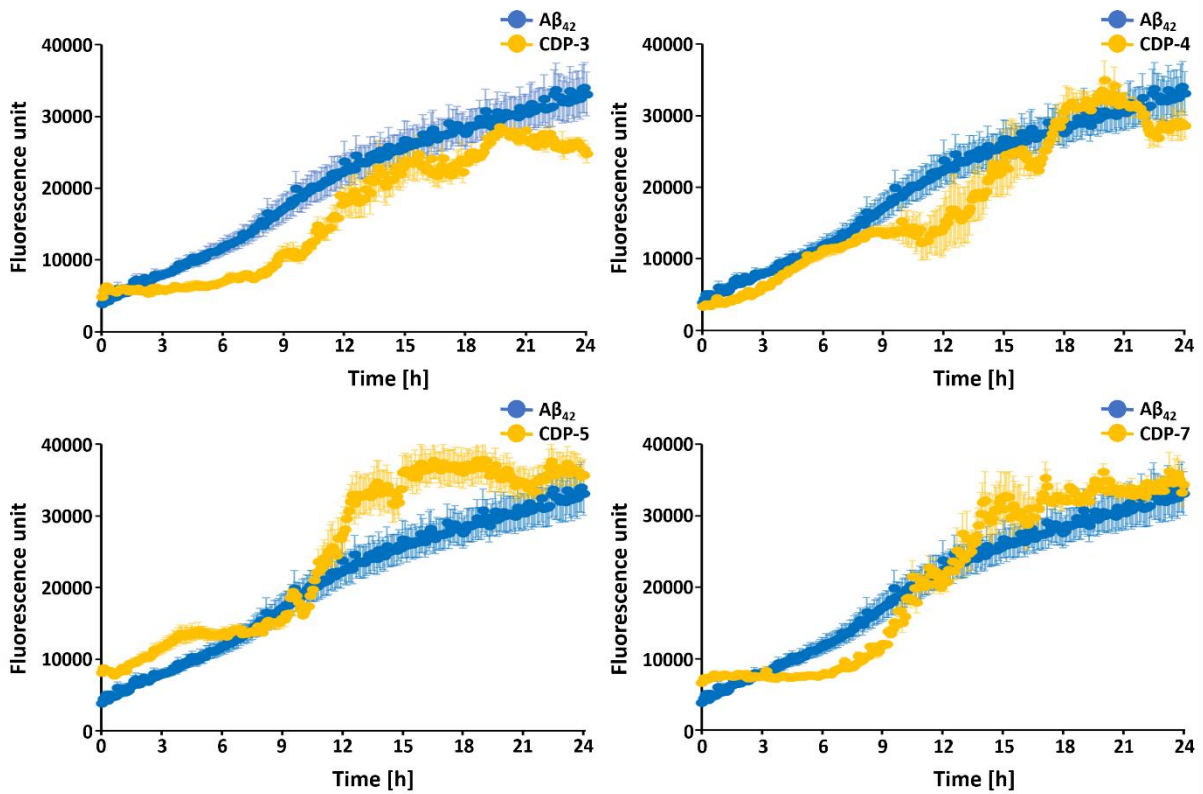

**Figure S3.** Effect of CDP-3, -4, -5 and -7 on  $A\beta_{42}$  aggregation using ThioflavinT assays. The ThT fluorescence signal with only  $A\beta_{42}$  is shown in blue. In orange, the action of CDP-3, -4, -5 and -7 in the signal of ThioflavinT. **A:** Effect of CDP-3 against  $A\beta_{42}$  aggregation. **B:** Effect of CDP-4 against  $A\beta_{42}$  aggregation. **C:** Effect of CDP-5 against  $A\beta_{42}$  aggregation and **D:** Effect of CDP-7 against  $A\beta_{42}$  aggregation. Data shown are the mean  $\pm$  SEM from three independent measurements ( $n = 3$ ).

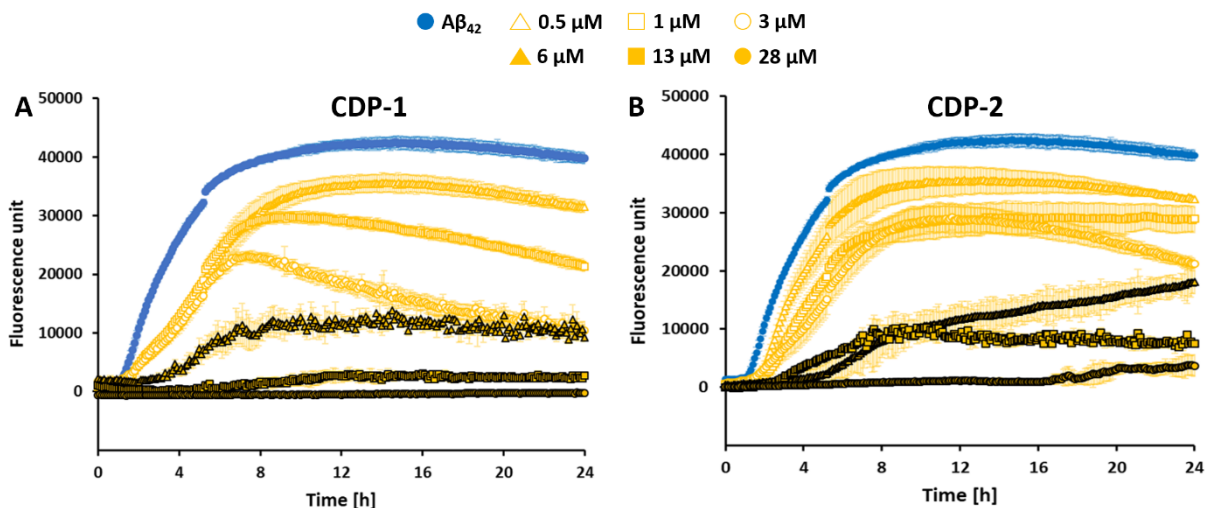

**Figure S4.** Dose dependency of CDP-1 and CDP-2 against the  $A\beta_{42}$  aggregation. The ThT fluorescence signal with only  $A\beta_{42}$  is shown in blue. In orange, the action of CDP-1 and -2 at different concentrations in the signal of ThioflavinT. Effect CDP-1 (**A**) and CDP-2 (**B**) doses (0.5, 1, 3, 6, 13 and 28  $\mu\text{M}$ ) on  $A\beta_{42}$  aggregation. Data shown are the mean  $\pm$  SEM from three independent measurements ( $n = 3$ ).

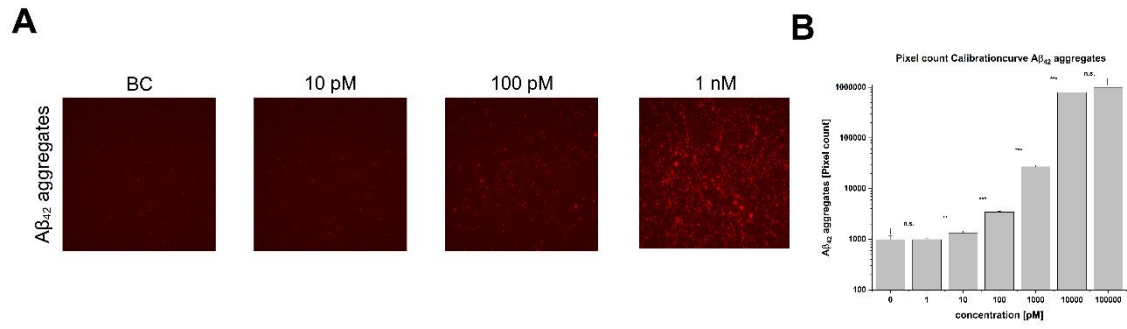

**Figure S5. sFIDA with  $A\beta$  aggregates in different concentrations.** A: TIRM images and B: Pixel count of the  $A\beta$  aggregate standard curve. Data shown are the mean  $\pm$  SEM from three independent measurements ( $n = 3$ ). Asterisks mean that the data differ from the control significantly at \*:  $p < 0.05$ , \*\*:  $p < 0.01$  and \*\*\*:  $p < 0.001$  levels according to analyses by a two sample t-test.

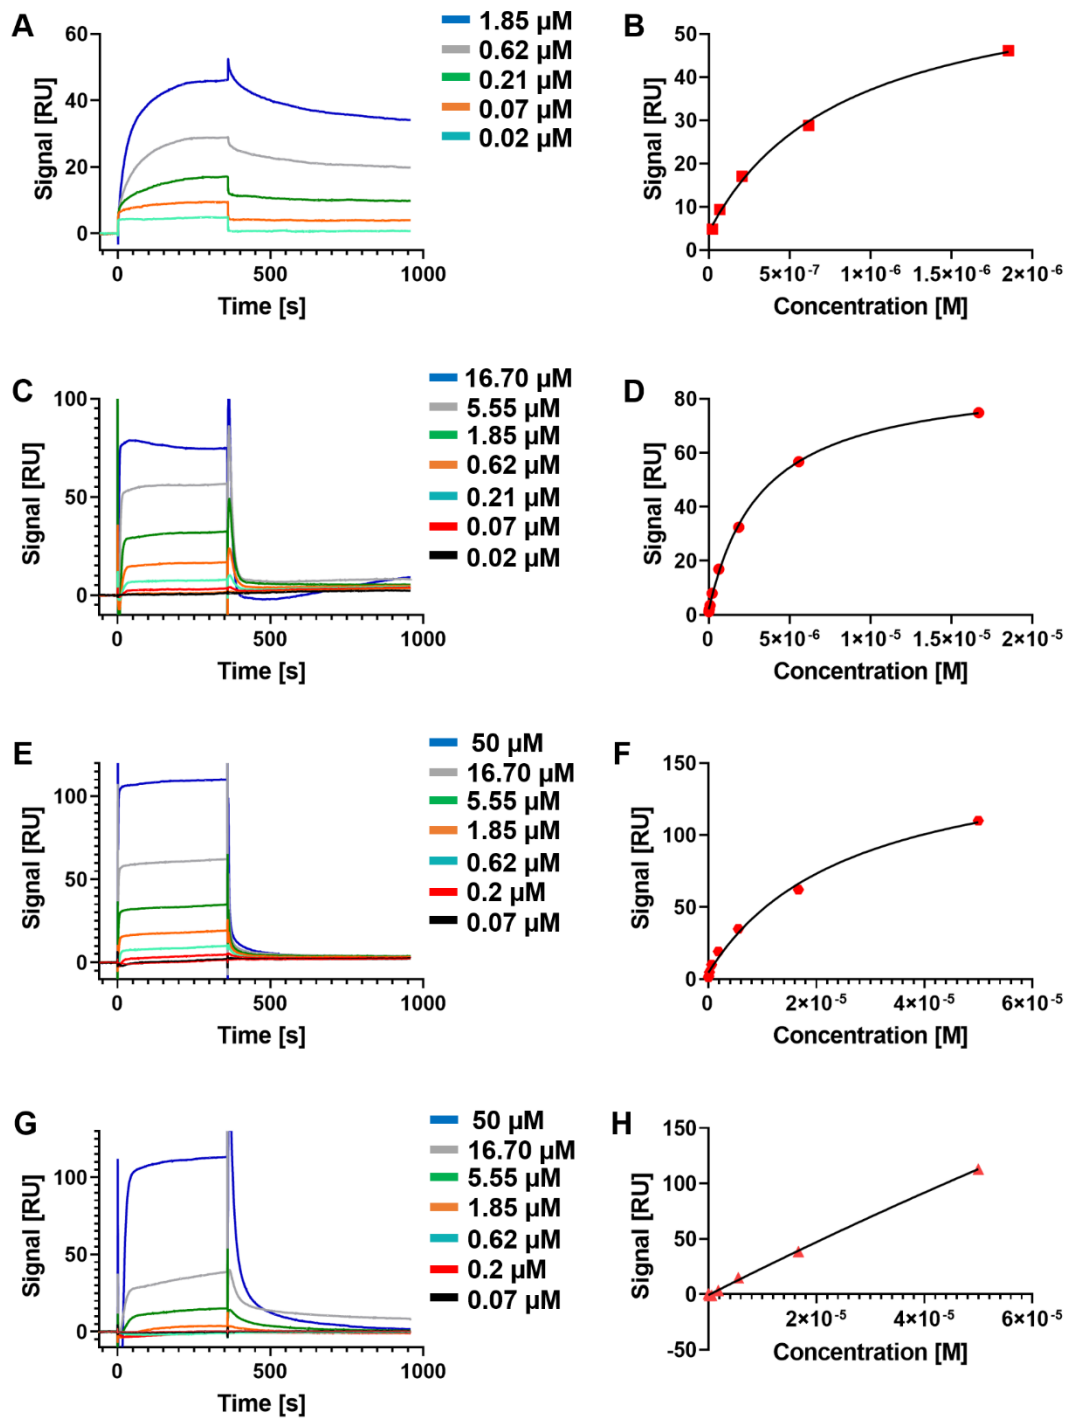

**Figure S6. Biacore SPR kinetic analyses of peptides to  $A\beta_{42}$ .** The sensorgram and saturation curve of the titration are shown. Sensorgrams were obtained by using a different concentration of peptides (Coloured sensorgrams represent different concentrations in  $\mu\text{M}$ ). Binding curves were fitted to a steady-state affinity model to get  $K_D$  values. CDP-1 (A, B), CDP-2 (C, D), CDP-6 (E, F) and CDP-8 (G, H).

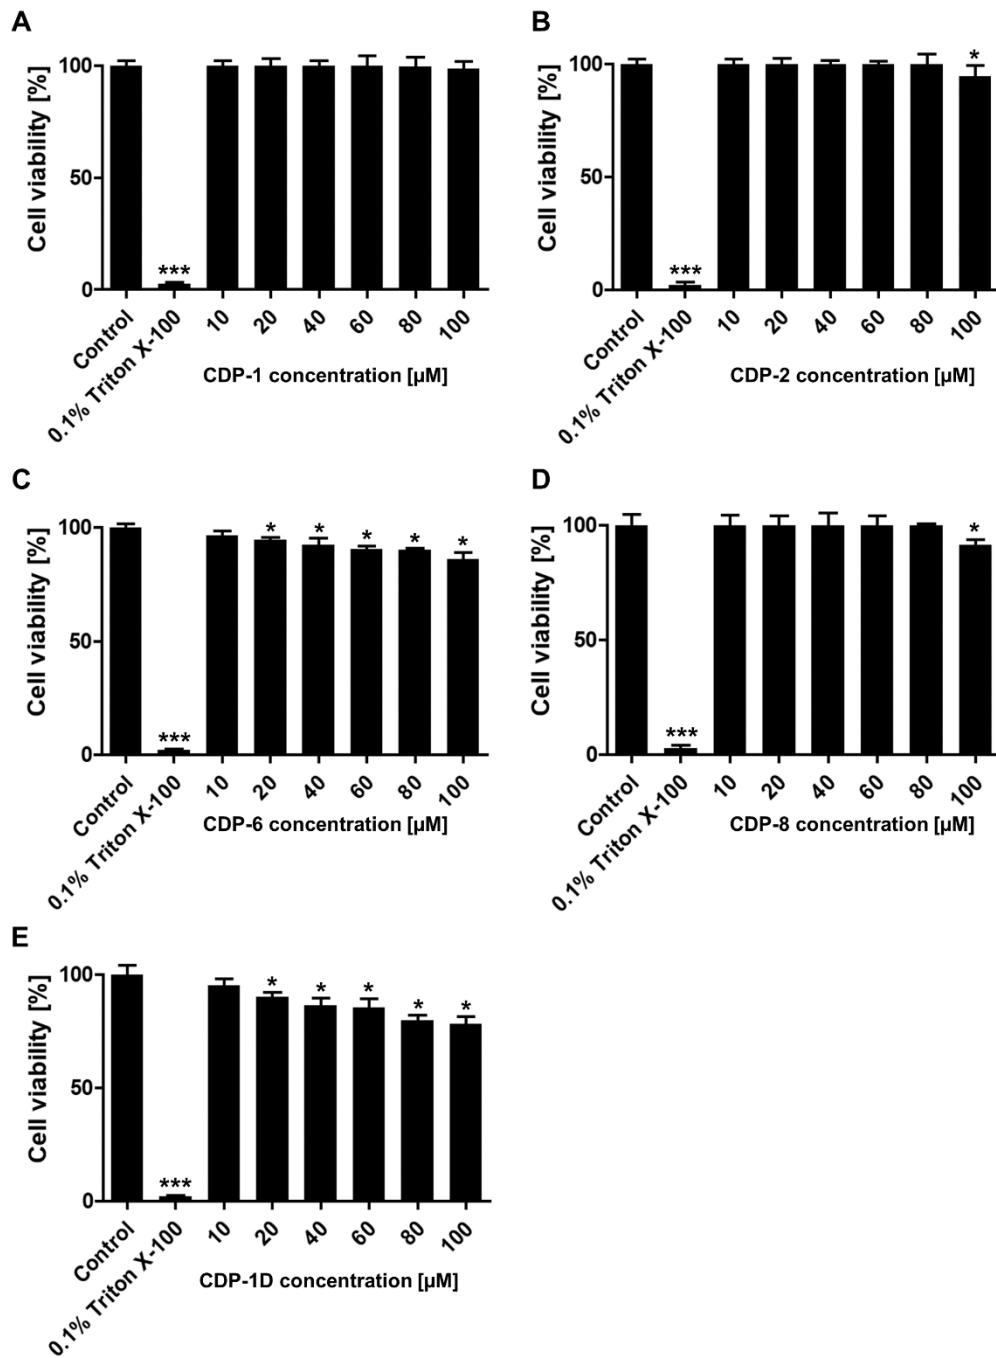

**Figure S7. MTT assay of CDPs on SH-SY5Y cells.** MTT assay evaluated the cytotoxicity of four L-peptides and one D-peptide, each at a concentration range between 0 to 100 μM. The control shows the cell viability without peptide, and 0.1% Triton x-100 was used as a negative control. **A:** CDP-1, **B:** CDP-2, **C:** CDP-6, **D:** CDP-8 and **E:** CDP-1D. Data shown are the means ± SD from three independent measurements (n = 3). Asterisks mean that the data differ from the control significantly at \*: p<0.05 and \*\*\*: p<0.001 levels according to analyses by two-way ANOVA.

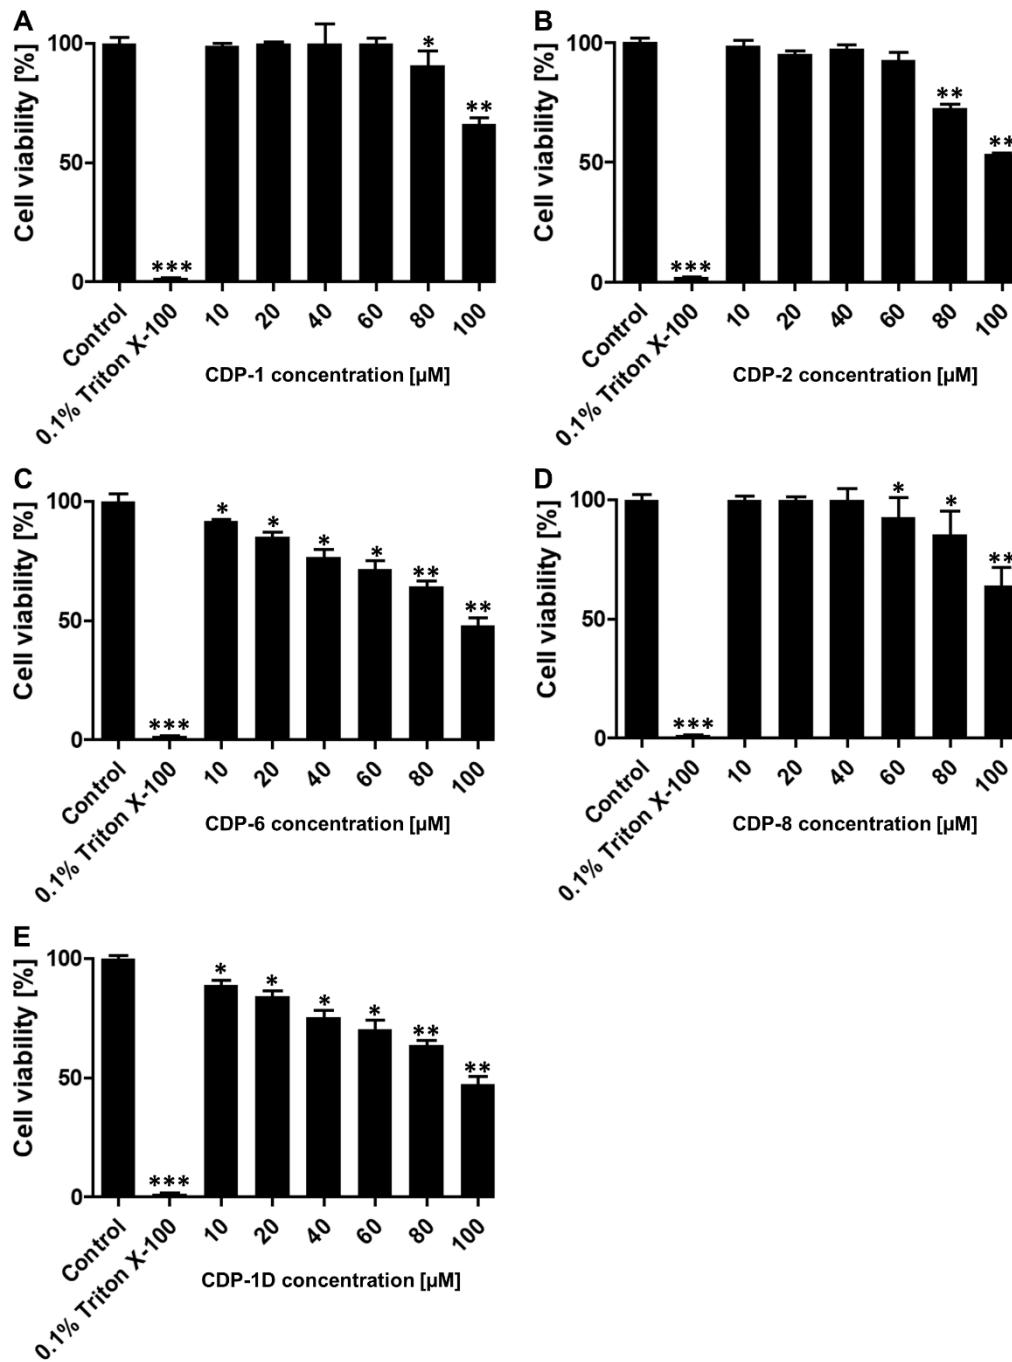

**Figure S8. MTT assay of CDPs on HEK293 cells.** MTT assay evaluated the cytotoxicity of four L-peptides and one D-peptide, each at a concentration range between 0 to 100 μM. The control shows the cell viability without peptide, and 0.1% Triton x-100 was used as a negative control. **A:** CDP-1, **B:** CDP-2, **C:** CDP-6, **D:** CDP-8 and **E:** CDP-1D. Data shown are the means ± SD from three independent measurements (n = 3). Asterisks mean that the data differ from the control significantly at \*: p<0.05, \*\*: p<0.01 and \*\*\*: p<0.001 levels according to analyses by two-way ANOVA.



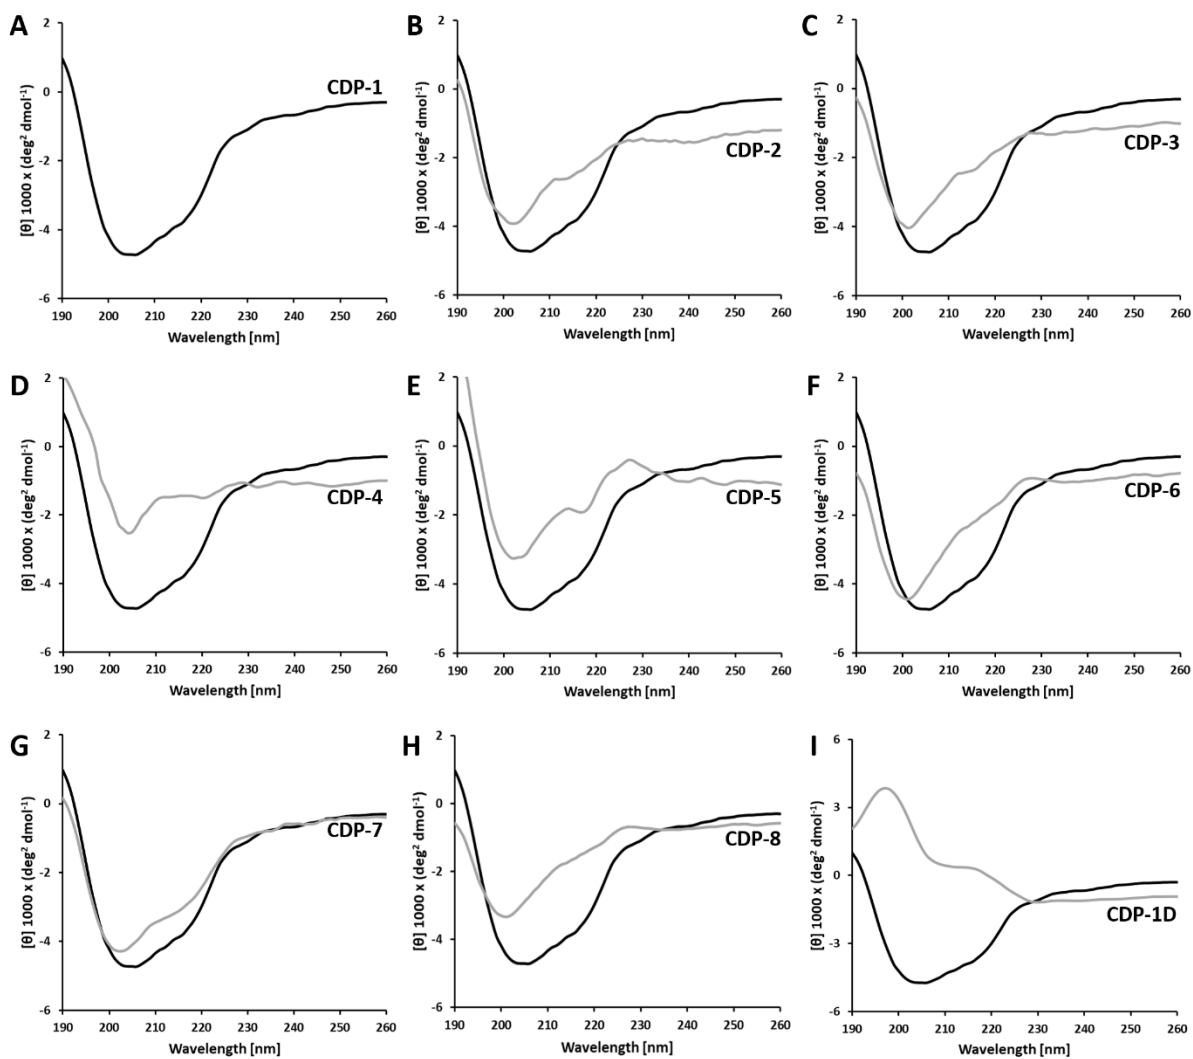

**Figure S9. CD-spectra of CDPs.** The CD spectra of the peptides are shown in reference to the spectrum of CDP-1. All peptides were solved in ddH<sub>2</sub>O, and the peptide concentration was 30  $\mu$ M. **A:** CDP-1, **B:** CDP-2, **C:** CDP-3, **D:** CDP-4, **E:** CDP-5, **F:** CDP-6, **G:** CDP-7, **H:** CDP-8 and **I:** CDP-1D.

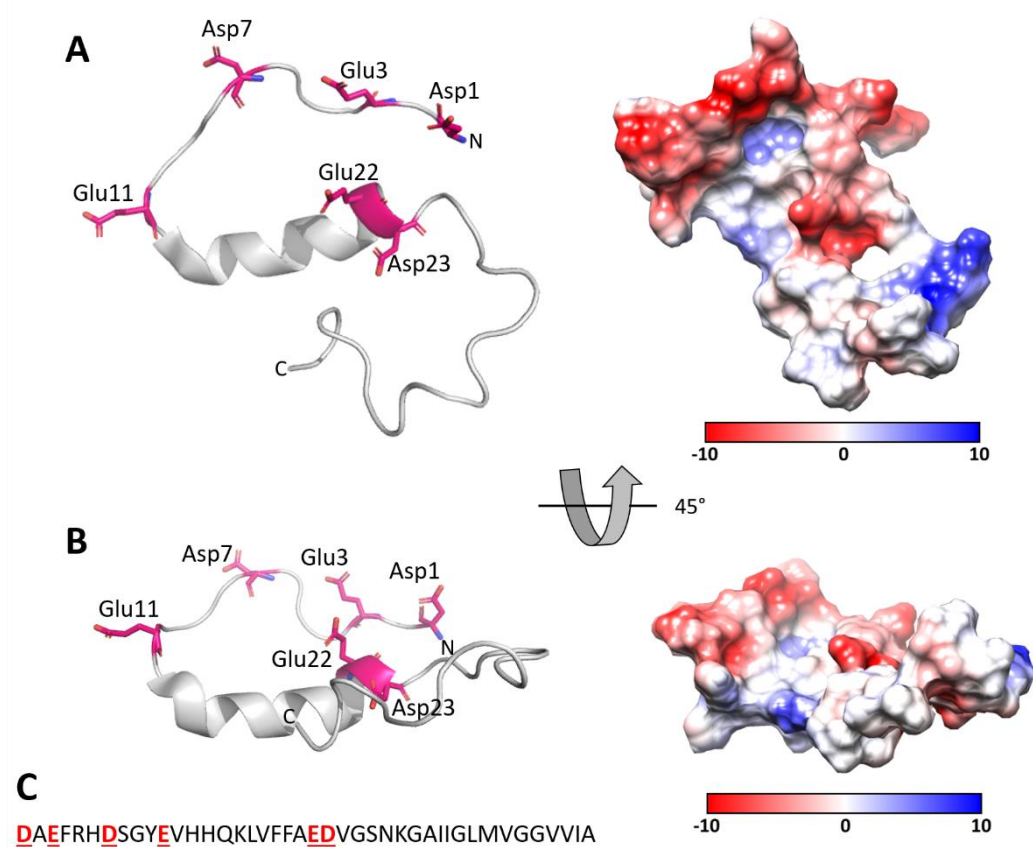

**Figure S10. Negatively charged residues in the A $\beta$  structure and surface.** Ribbon view and coloumbic surface representation of the A $\beta$  monomer structure (PDB: 2LFM). Residues with negative charges are highlighted as sticks. **A:** Ribbon and surface view of the A $\beta$  monomer and **B:** bent forward 45°. **C:** Sequence of A $\beta$ 42, the negatively charged residues are highlighted.

**Table S1. Secondary structure content of CDPs, based on CD-experiments<sup>1</sup>.**

| Peptides | Secondary structure |                     |            |
|----------|---------------------|---------------------|------------|
|          | $\alpha$ -helix [%] | $\beta$ -strand [%] | Others [%] |
| CDP-1    | 25                  | -                   | 75         |
| CDP-2    | 3                   | -                   | 97         |
| CDP-3    | 4                   | -                   | 96         |
| CDP-4    | 7                   | -                   | 93         |
| CDP-5    | 4                   | -                   | 96         |
| CDP-6    | 6                   | -                   | 94         |
| CDP-7    | 8                   | -                   | 92         |
| CDP-8    | 6                   | -                   | 94         |

<sup>1</sup>Secondary structure determination was performed using the online tool BeStSel (<https://bestsel.elte.hu/index.php>).
